# Supplementary material for: Possible Synthetic Approaches for Heterobimetallic Complexes by Using nNHC/tzNHC Heteroditopic Carbene Ligands
Source: MDPI journal article supplement (doi:10.3390/molecules24122305), 2019-06-21
Supplement: s1 [file s1]

## Possible synthetic approaches for heterobimetallic complexes by using *n*NHC/*tz*NHC heteroditopic carbene ligands

Andrea Longhi <sup>1</sup>, Marco Baron <sup>1</sup>, Marzio Rancan <sup>2</sup>, Gregorio Bottaro <sup>2</sup>, Lidia Armelao <sup>1,2</sup>, Paolo Sgarbossa <sup>3</sup> and Cristina Tubaro <sup>\*1</sup>

<sup>1</sup> Department of Chemical Sciences, University of Padova, via F. Marzolo 1, 35131 Padova, Italy.

<sup>2</sup> Institute of Condensed Matter Chemistry and Technologies for Energy, National Research Council, ICMATE-CNR, c/o Department of Chemical Sciences, University of Padova, via F. Marzolo 1, 35131 Padova, Italy.

<sup>3</sup> Department of Industrial Engineering, University of Padova, via F. Marzolo 9, 35131 Padova, Italy.

### Table of contents:

|                                                                                                                              |    |
|------------------------------------------------------------------------------------------------------------------------------|----|
| Figures S1-S25. NMR spectra of the proligands and complexes .....                                                            | 2  |
| Table S1. Crystal data and structure refinement for compounds <b>3b</b> , <b>4</b> , <b>6</b> , <b>7</b> and <b>11</b> ..... | 15 |

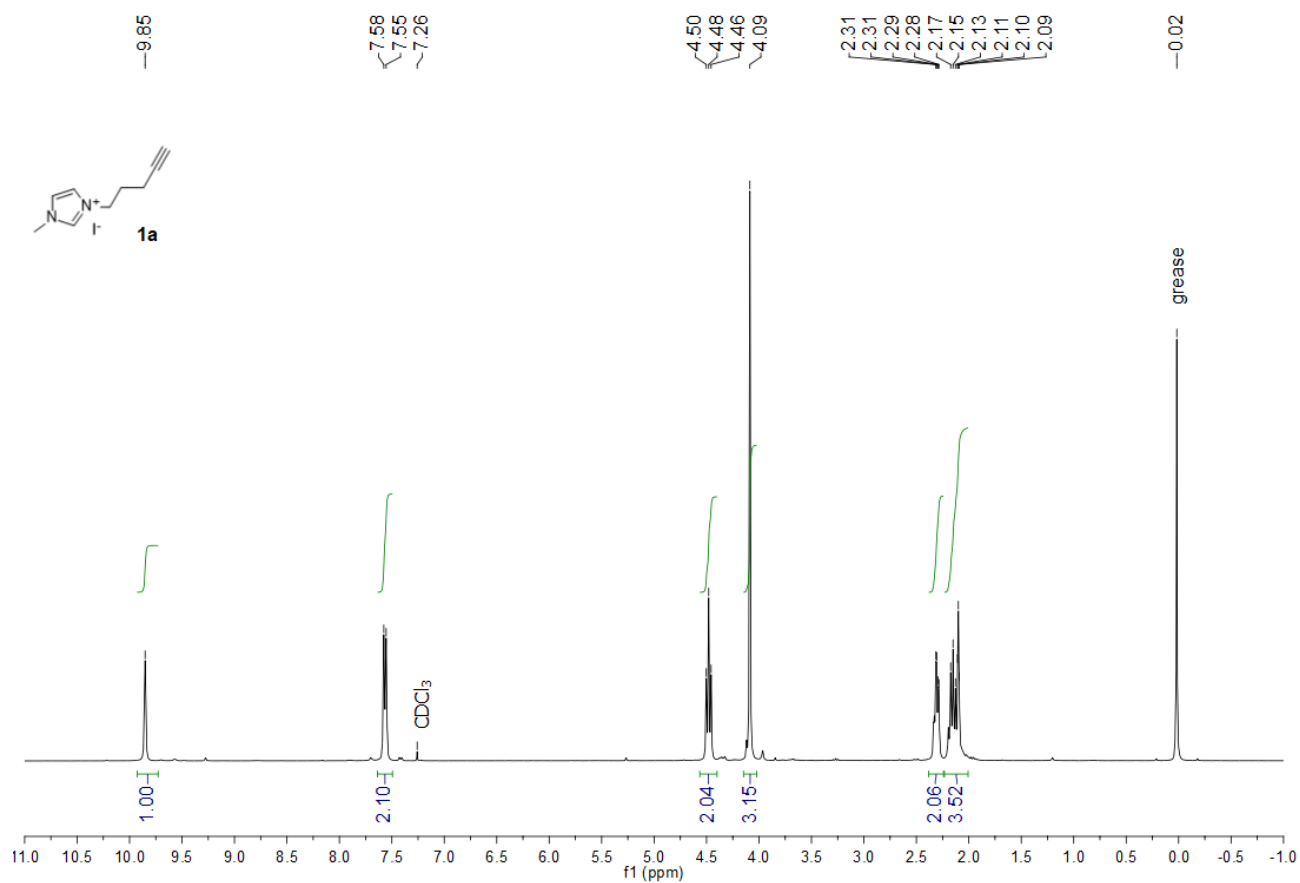

Figure S1. <sup>1</sup>H NMR of compound **1a** in CDCl<sub>3</sub>.

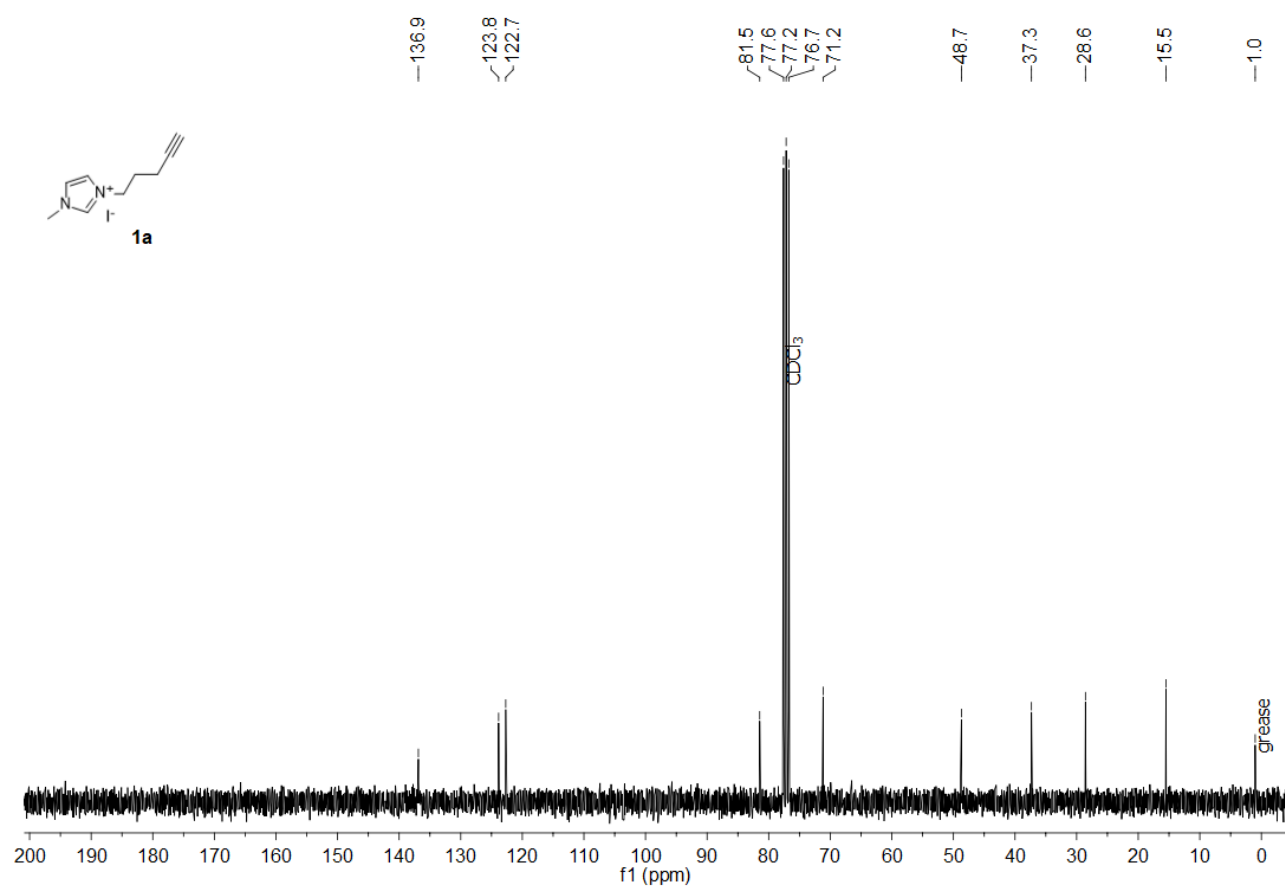

Figure S2. <sup>13</sup>C{<sup>1</sup>H} NMR of compound **1a** in CDCl<sub>3</sub>.

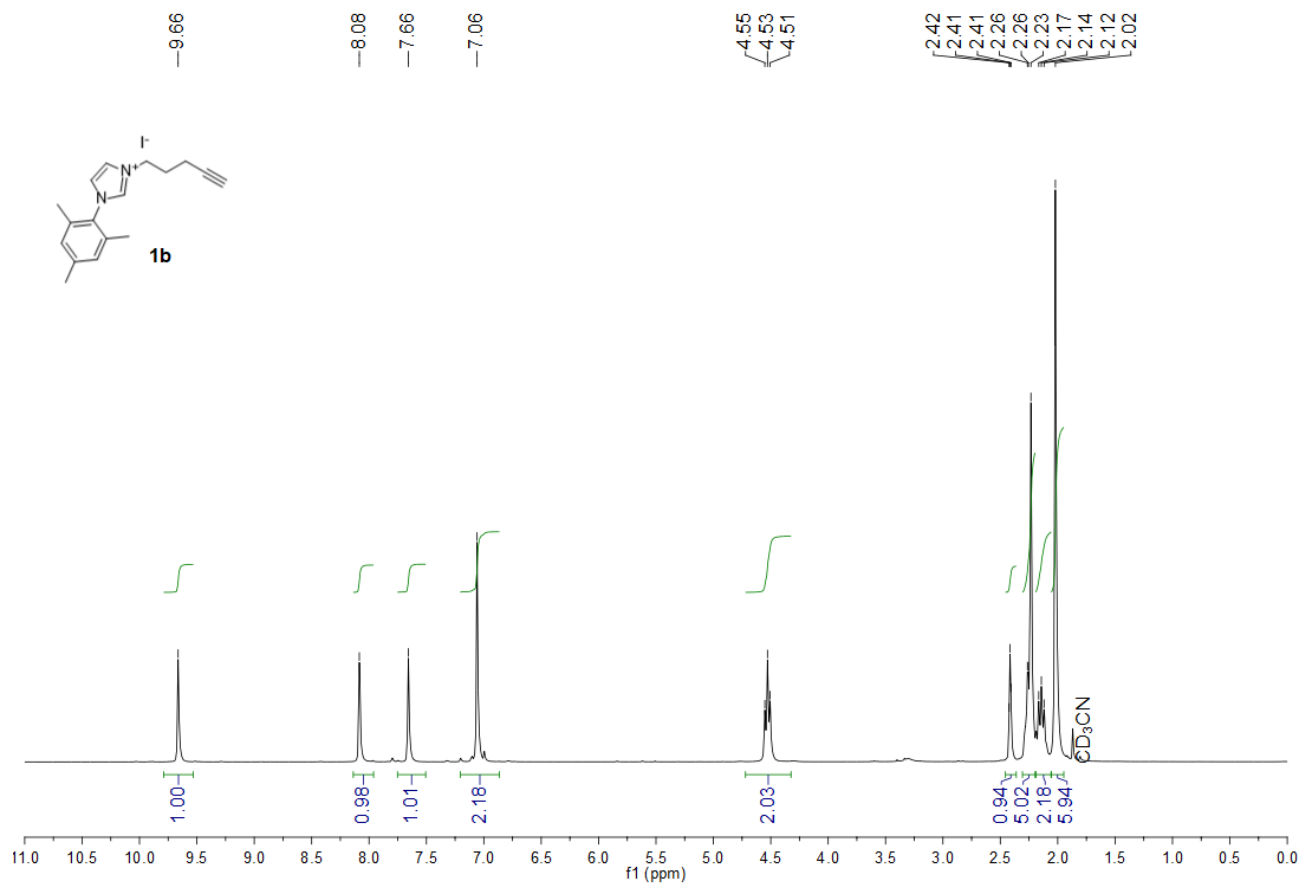

Figure S3. <sup>1</sup>H NMR of compound **1b** in CD<sub>3</sub>CN.

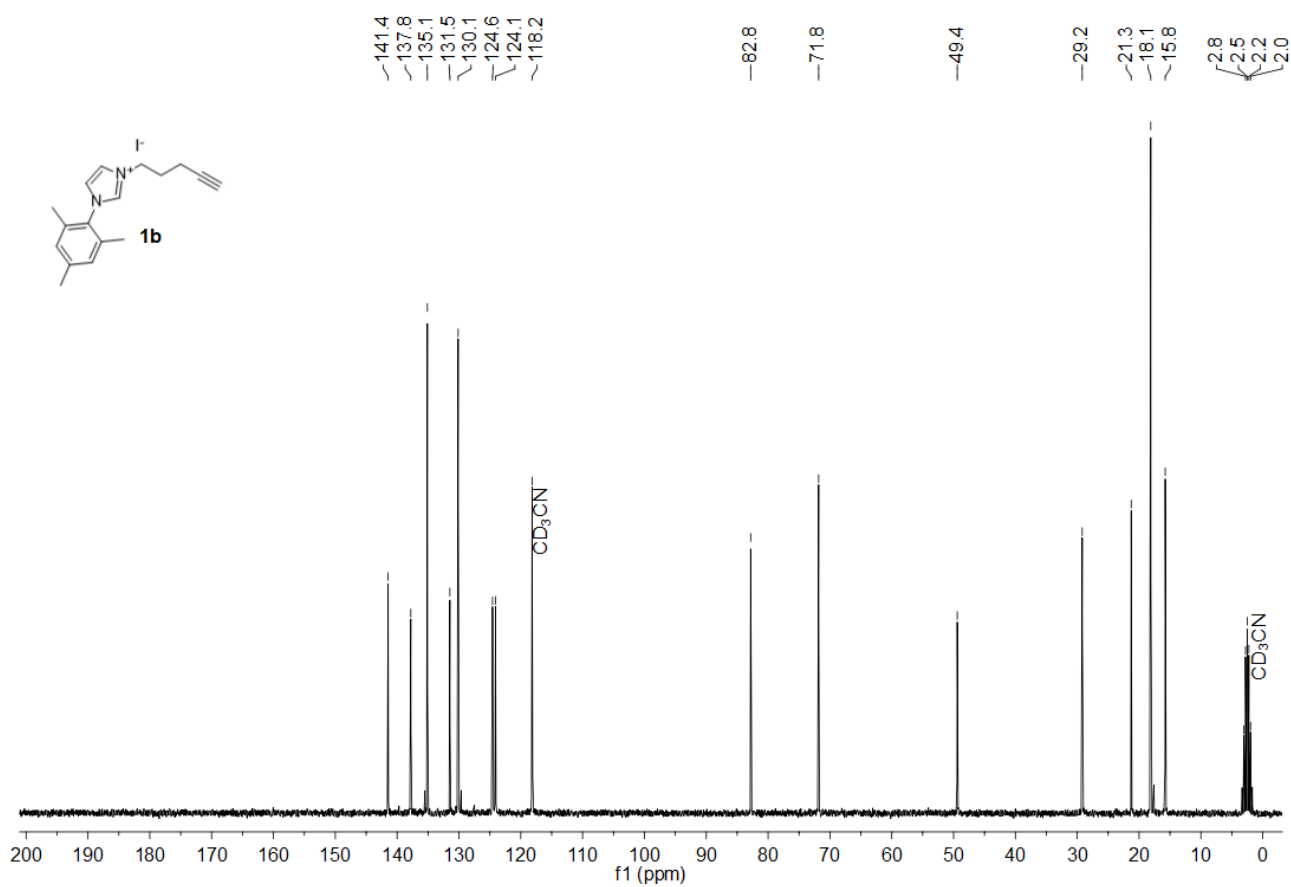

Figure S4. <sup>13</sup>C{<sup>1</sup>H} NMR of compound **1b** in CD<sub>3</sub>CN.

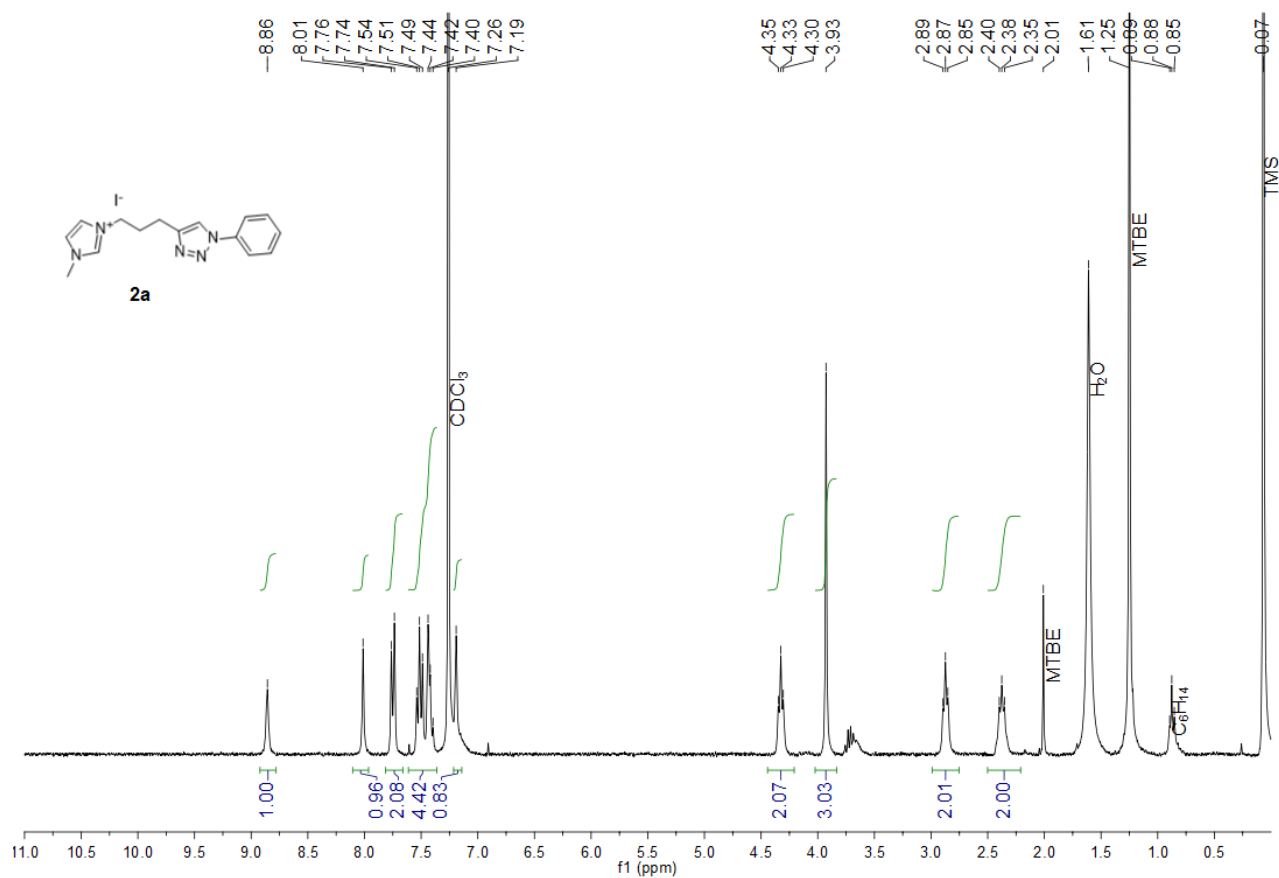

Figure S5.  $^1\text{H}$  NMR of compound **2a** in CDCl<sub>3</sub>.

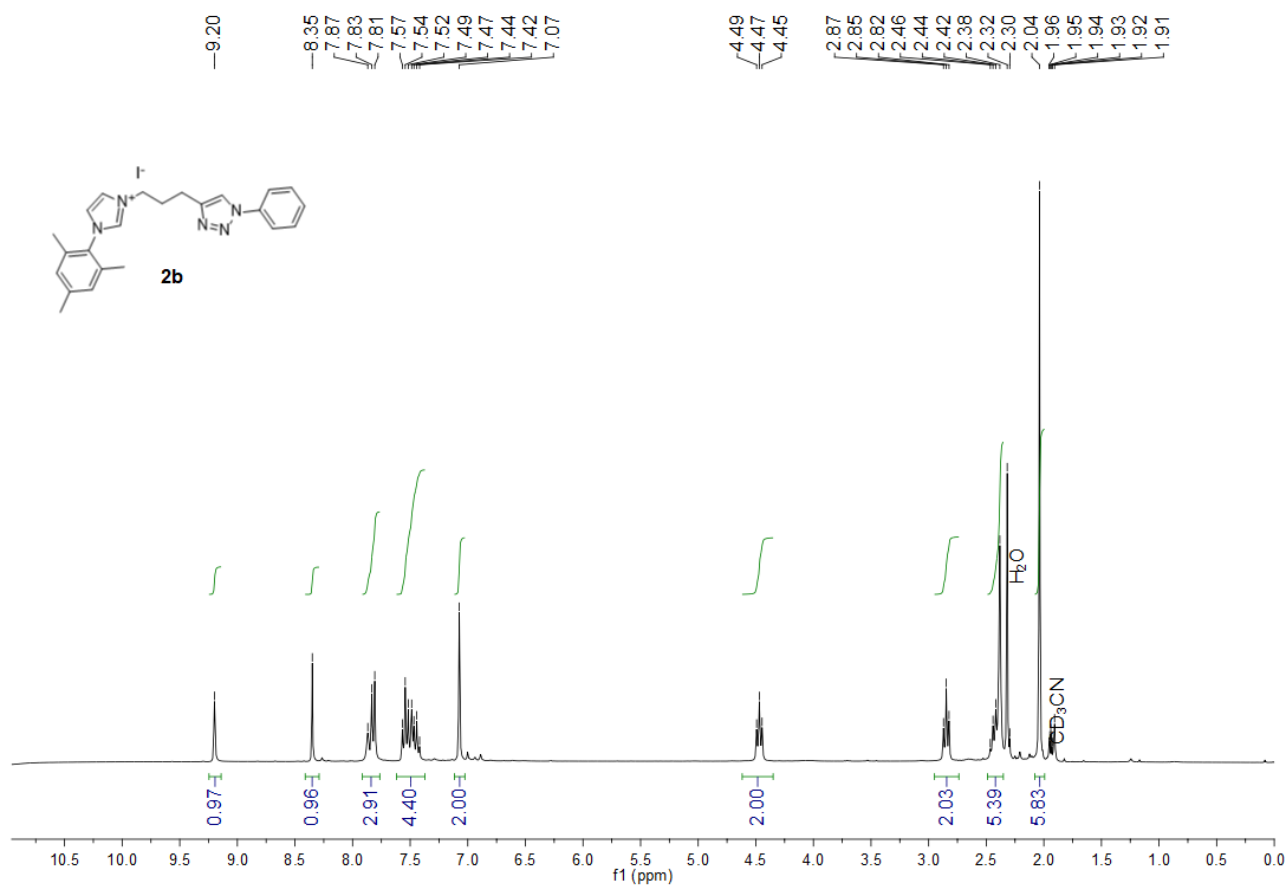

Figure S6. <sup>1</sup>H NMR of compound **2b** in CD<sub>3</sub>CN.

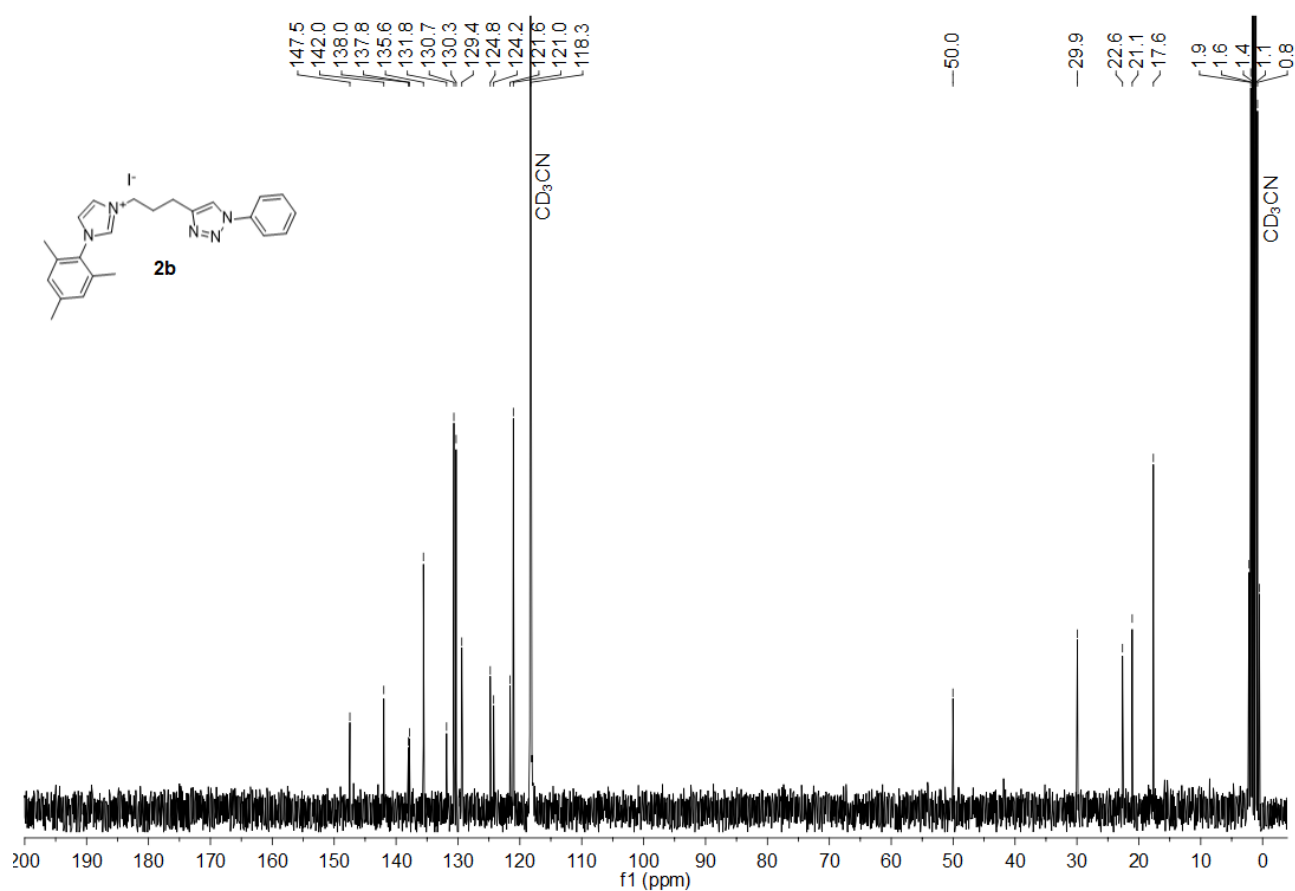

Figure S7. <sup>13</sup>C{<sup>1</sup>H} NMR of compound **2b** in CD<sub>3</sub>CN.

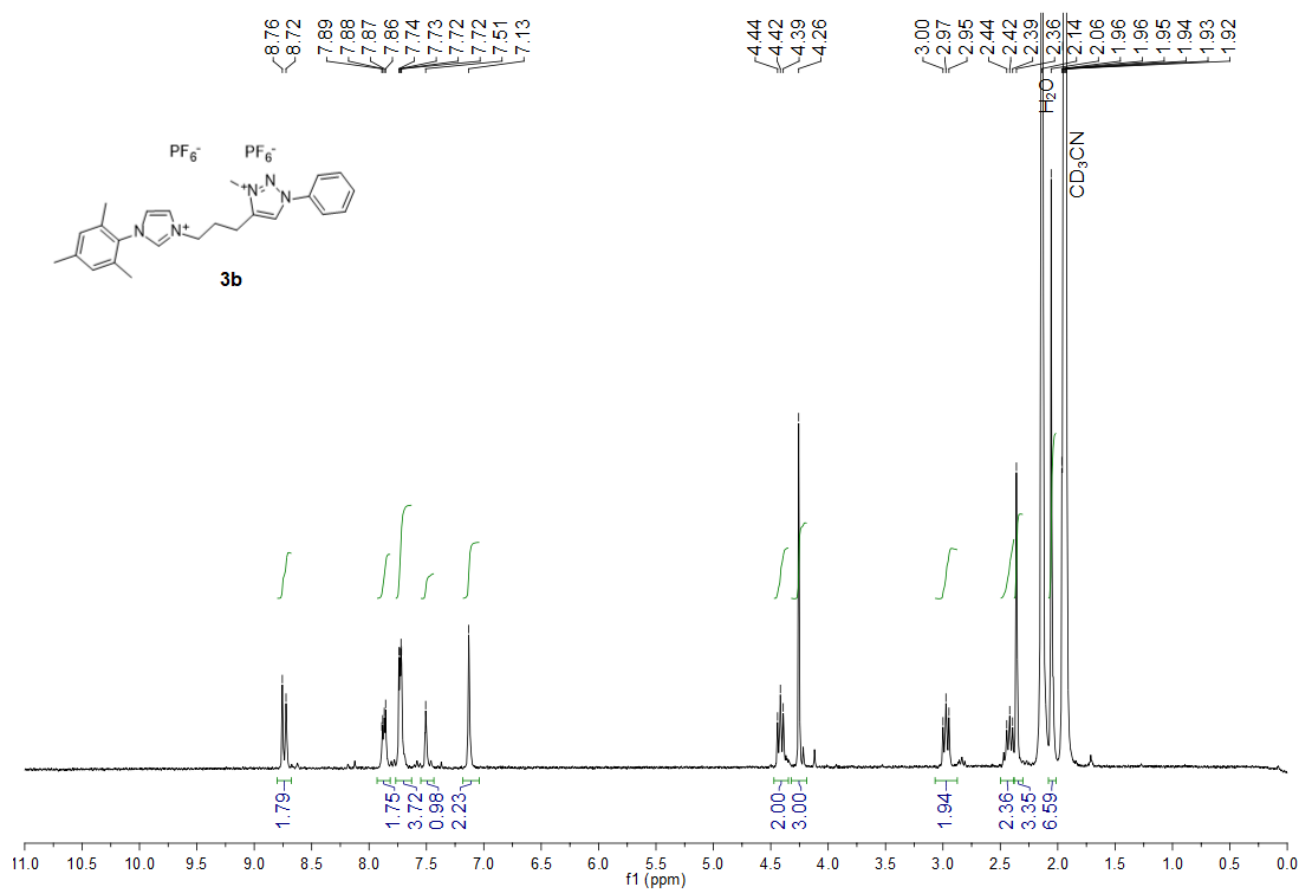

Figure S8. <sup>1</sup>H NMR of compound **3b** in CD<sub>3</sub>CN.

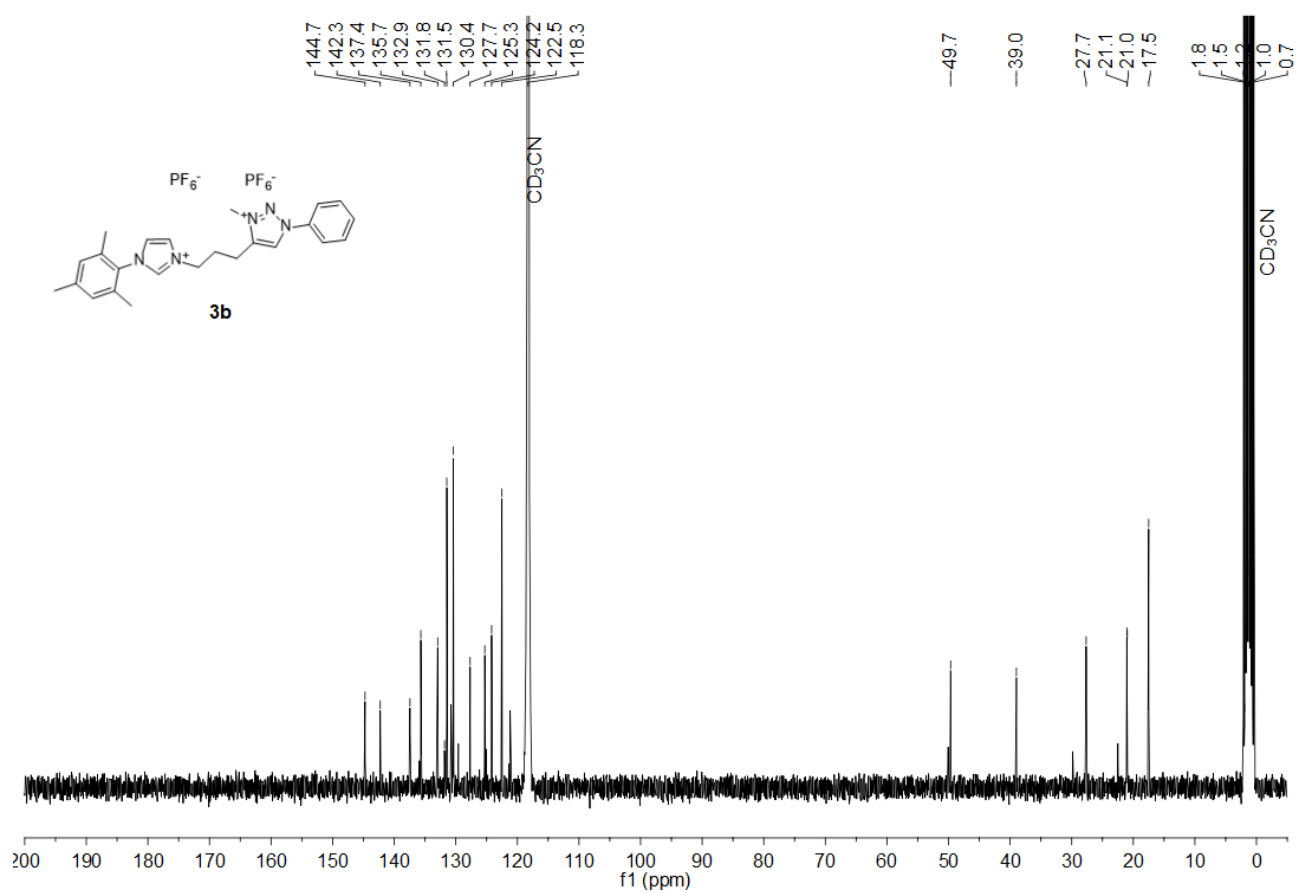

Figure S9. <sup>13</sup>C{<sup>1</sup>H} NMR of compound **3b** in CD<sub>3</sub>CN.

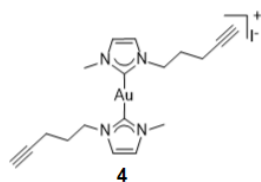

Chemical structure of compound **4** is shown in the top left. The structure is a gold complex with two 1-ethynyl-4-methyl-5-(4-ethynylbutyl)imidazole ligands. The gold atom is coordinated to the two imidazole rings. The ligands are labeled with 'Au' and 'I<sup>+</sup>'.

**1H NMR spectrum (CD<sub>3</sub>CN):**

- Chemical Shifts (ppm):** 185.0, 124.0, 122.5, 118.3, 83.6, 71.0, 66.2, 55.3, 50.4, 38.5, 30.8, 15.9, 15.5, 1.8, 1.5, 1.3, 1.0.
- Solvent Peaks:** CD<sub>3</sub>CN (118.3, 1.3 ppm), (CH<sub>3</sub>CH<sub>2</sub>)<sub>2</sub>O (3.3, 4.7 ppm).
- Assignment:** The peak at 185.0 ppm is assigned to the alkyne. The peak at 124.0 ppm is assigned to the alkyne. The peak at 122.5 ppm is assigned to the alkyne. The peak at 118.3 ppm is assigned to the alkyne. The peak at 83.6 ppm is assigned to the alkyne. The peak at 71.0 ppm is assigned to the alkyne. The peak at 66.2 ppm is assigned to the alkyne. The peak at 55.3 ppm is assigned to the alkyne. The peak at 50.4 ppm is assigned to the alkyne. The peak at 38.5 ppm is assigned to the alkyne. The peak at 30.8 ppm is assigned to the alkyne. The peak at 15.9 ppm is assigned to the alkyne. The peak at 15.5 ppm is assigned to the alkyne. The peak at 1.8 ppm is assigned to the alkyne. The peak at 1.5 ppm is assigned to the alkyne. The peak at 1.3 ppm is assigned to the alkyne. The peak at 1.0 ppm is assigned to the alkyne.

7





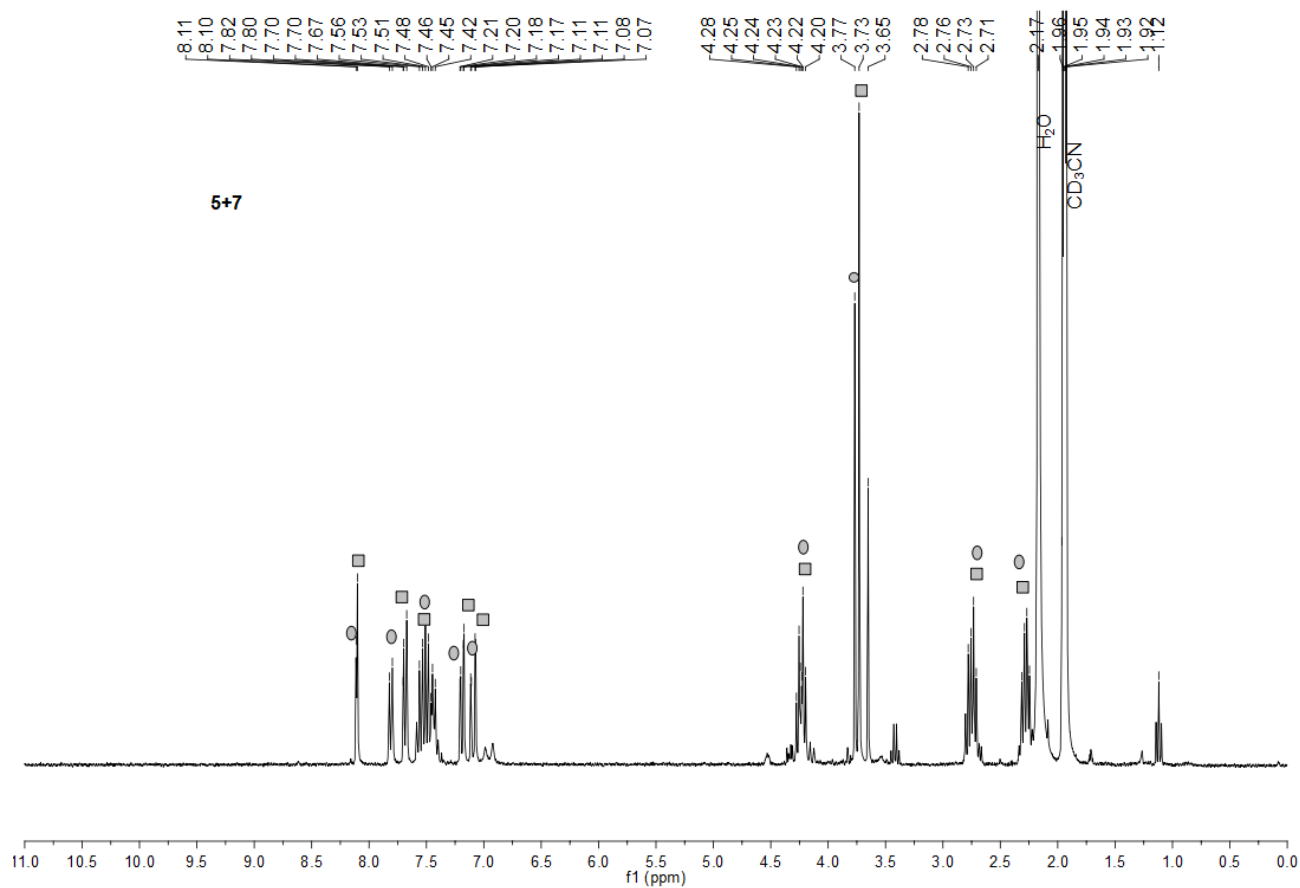

Figure S14. <sup>1</sup>H NMR of the mixture **5+7** in CD<sub>3</sub>CN; ■ identifies signals of complex **5**, ● those of complex **7**.

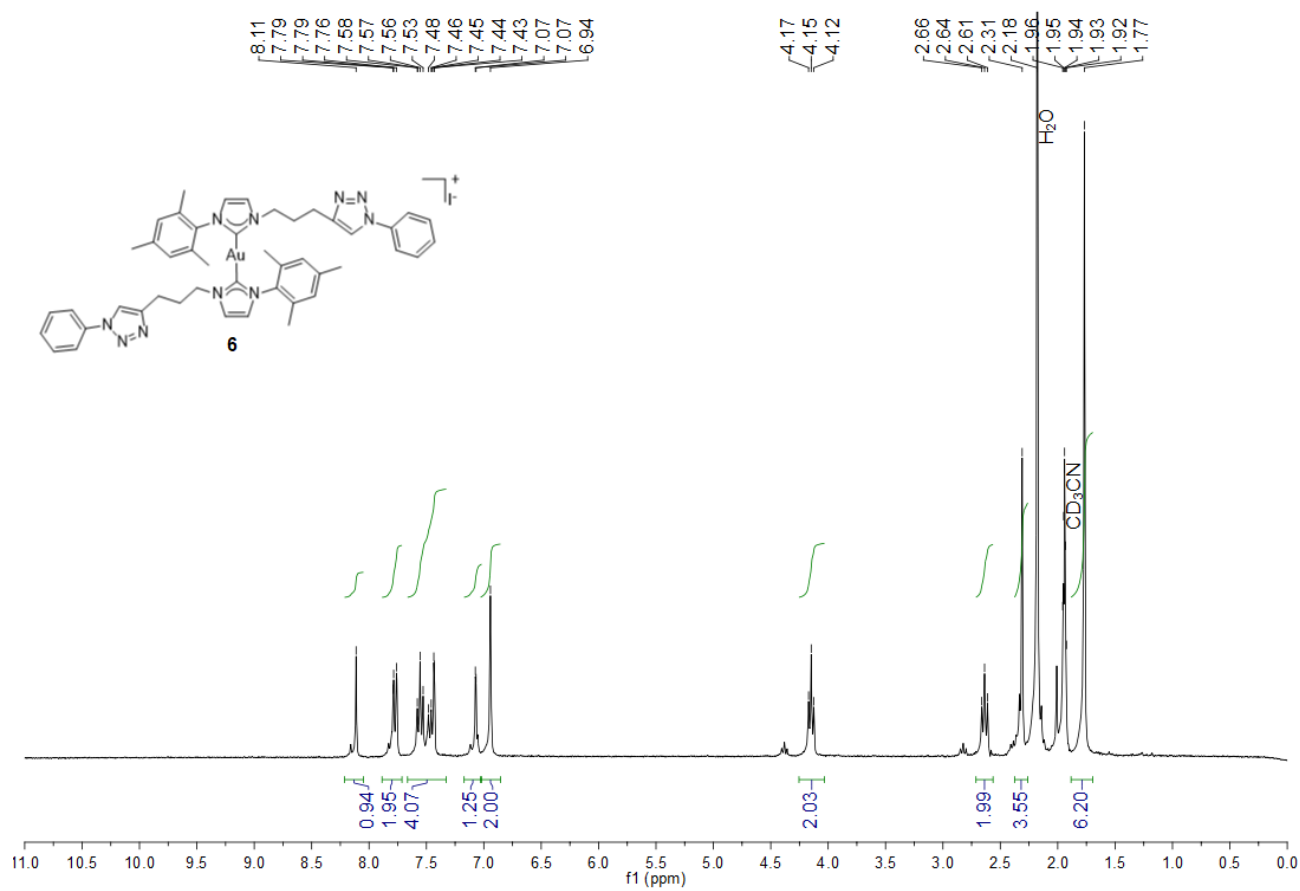

Figure S15. <sup>1</sup>H NMR of complex **6** in CD<sub>3</sub>CN.

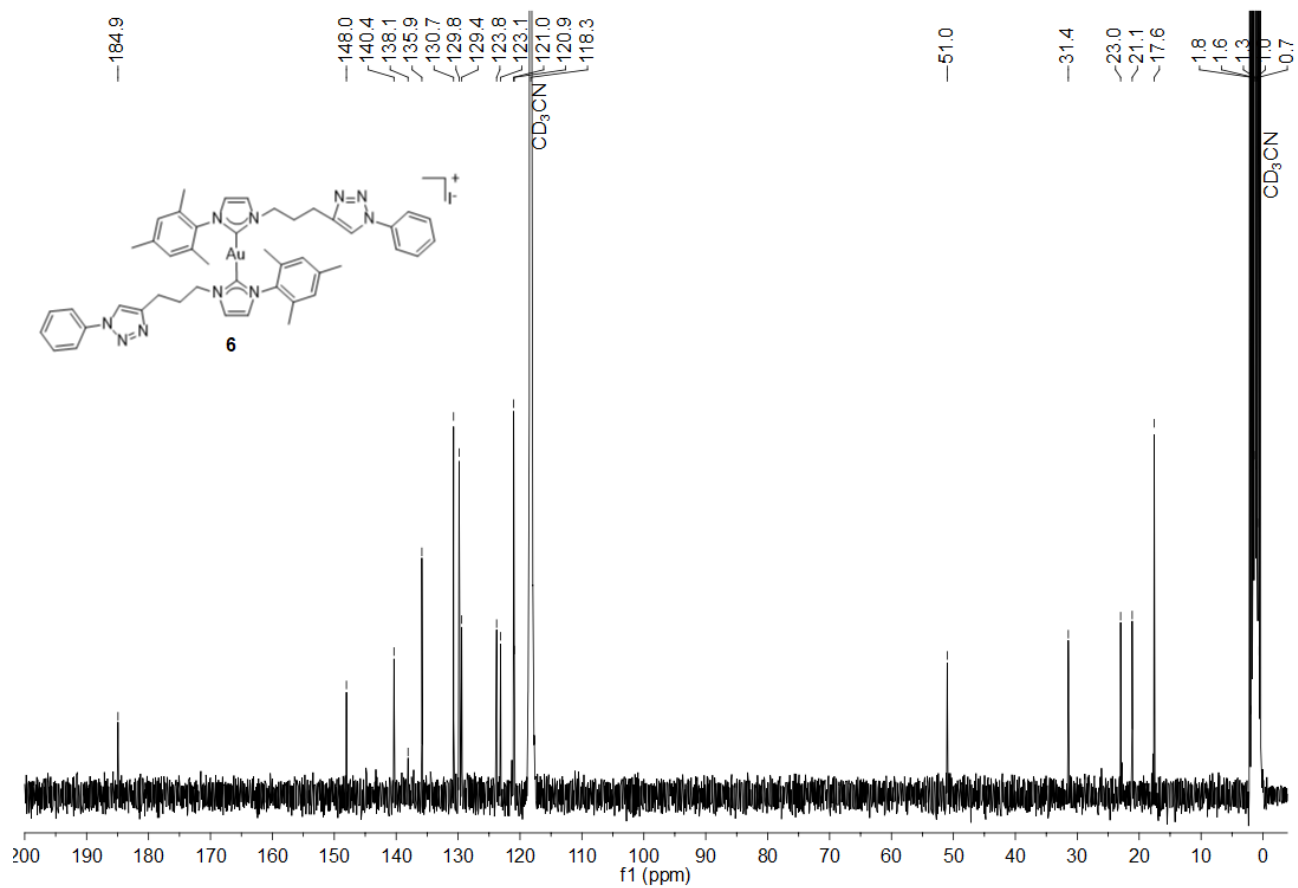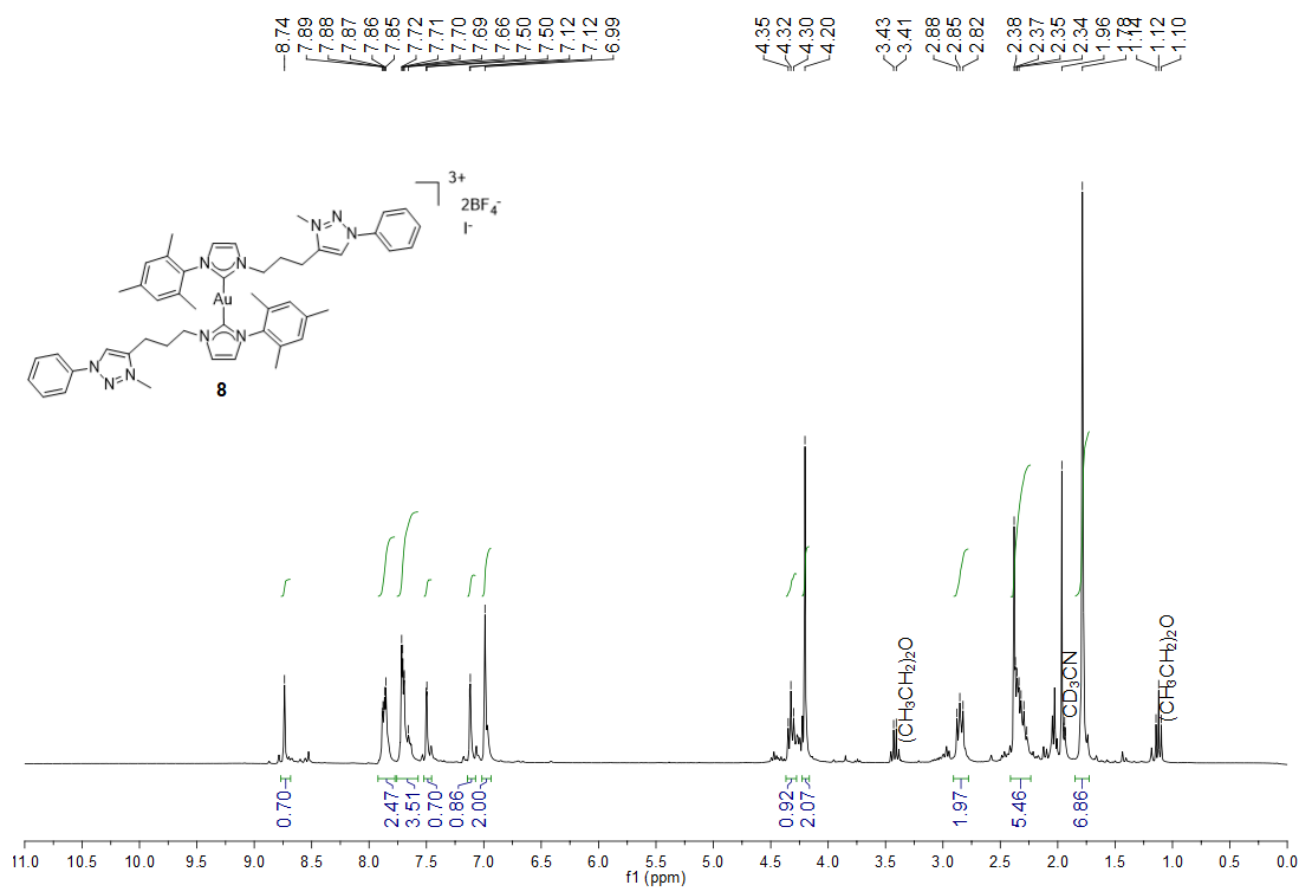

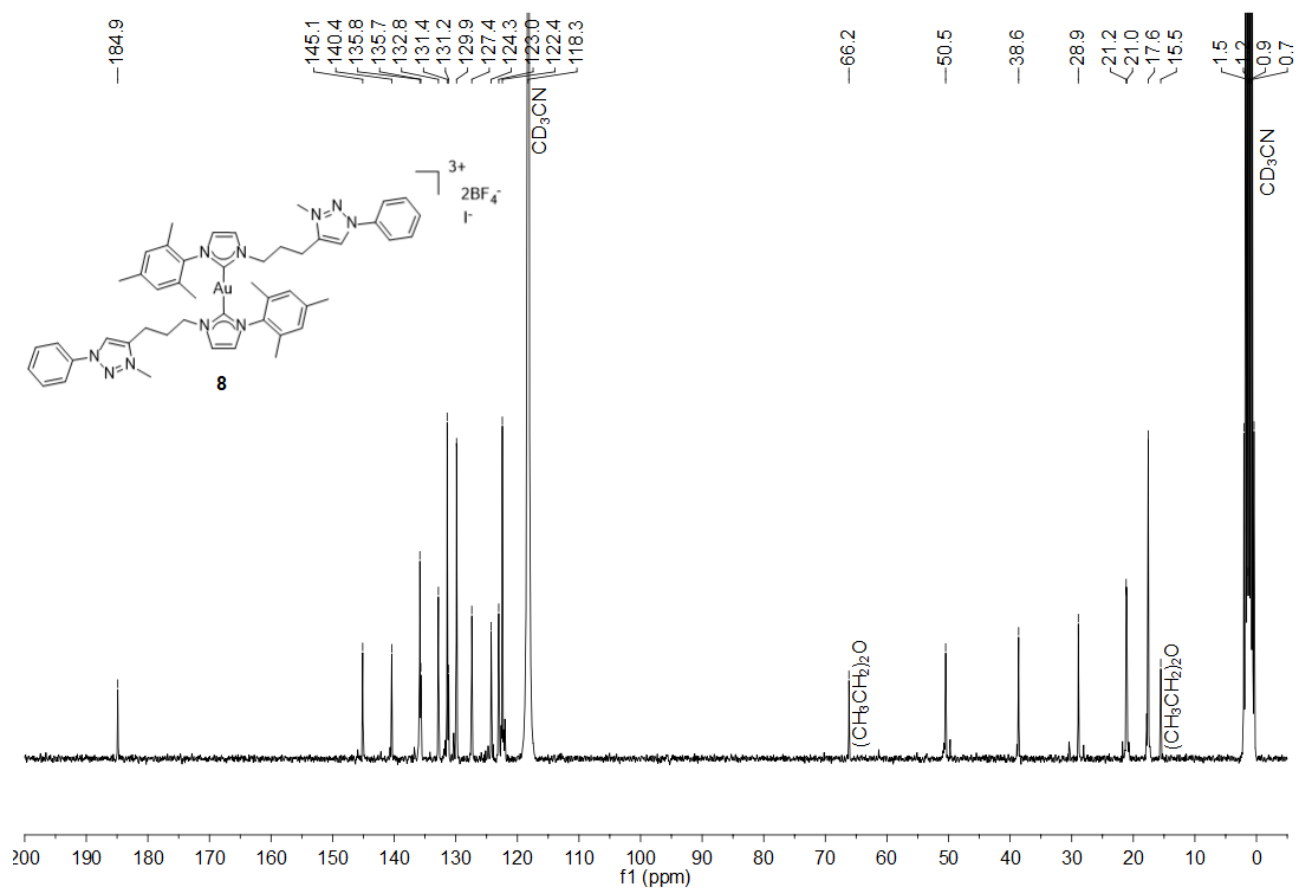

Figure S18.  $^{13}\text{C}\{^1\text{H}\}$  NMR of complex **8** in CD<sub>3</sub>CN.

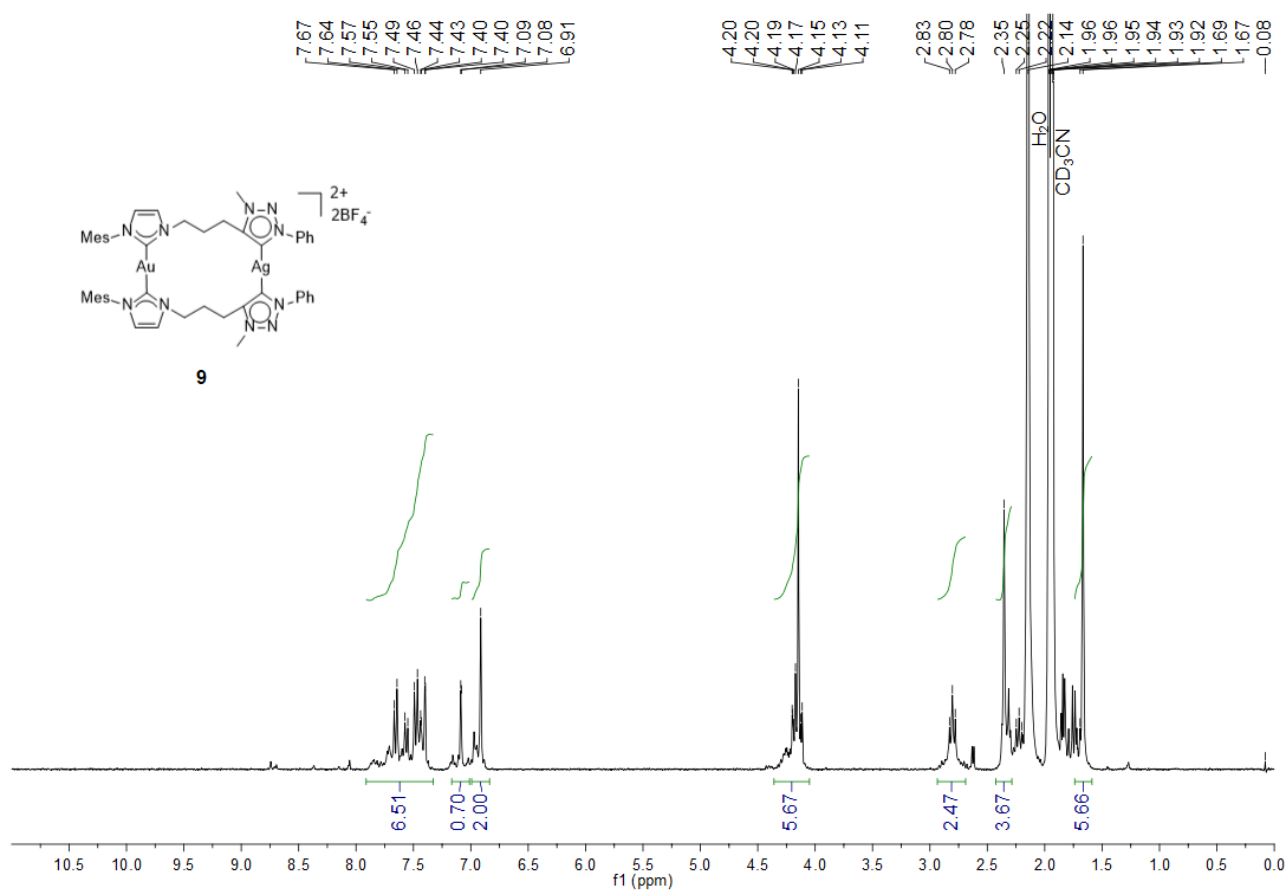

Figure S19.  $^1\text{H}$  NMR of complex **9** in CD<sub>3</sub>CN.

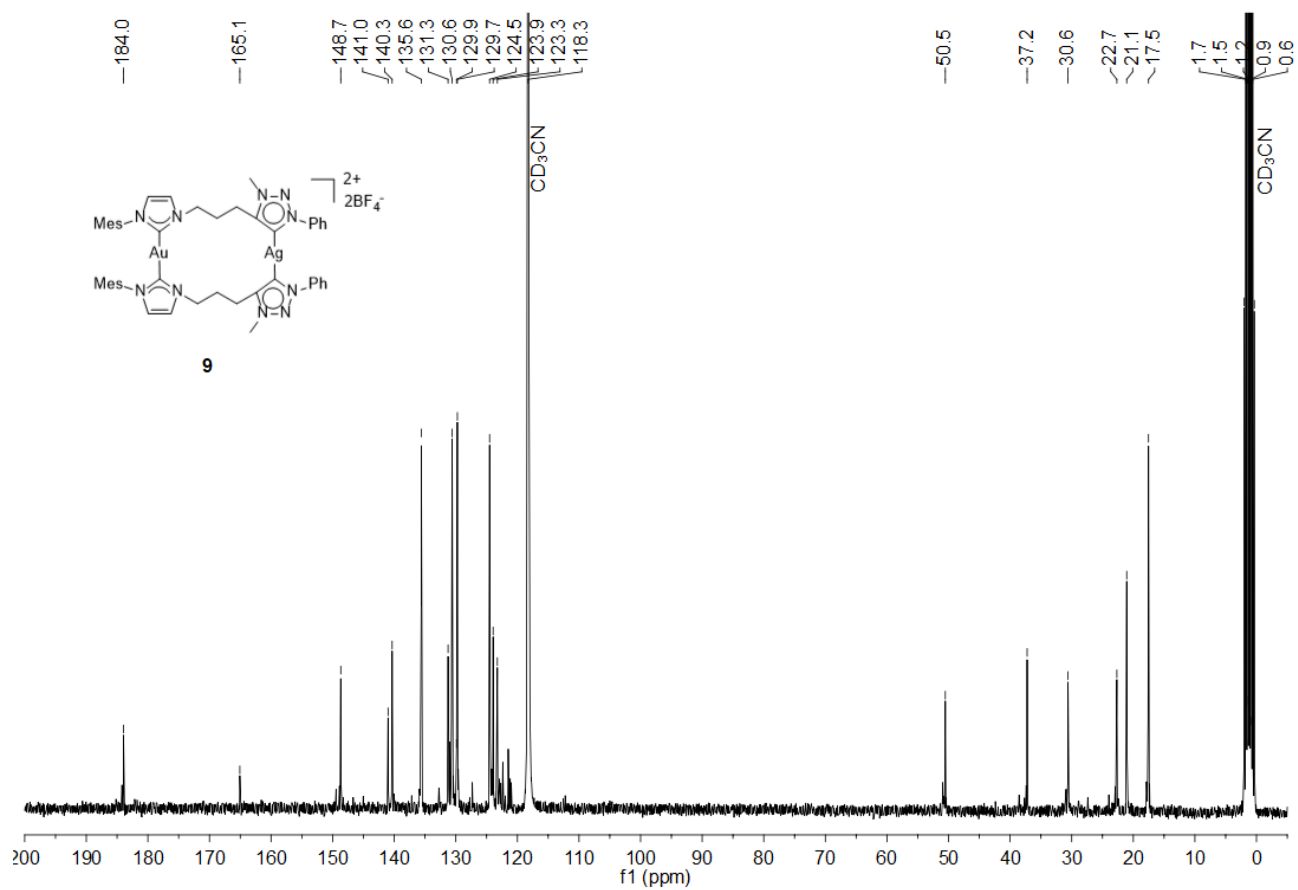

Figure S20.  $^{13}\text{C}\{^1\text{H}\}$  NMR of complex **9** in  $\text{CD}_3\text{CN}$ .

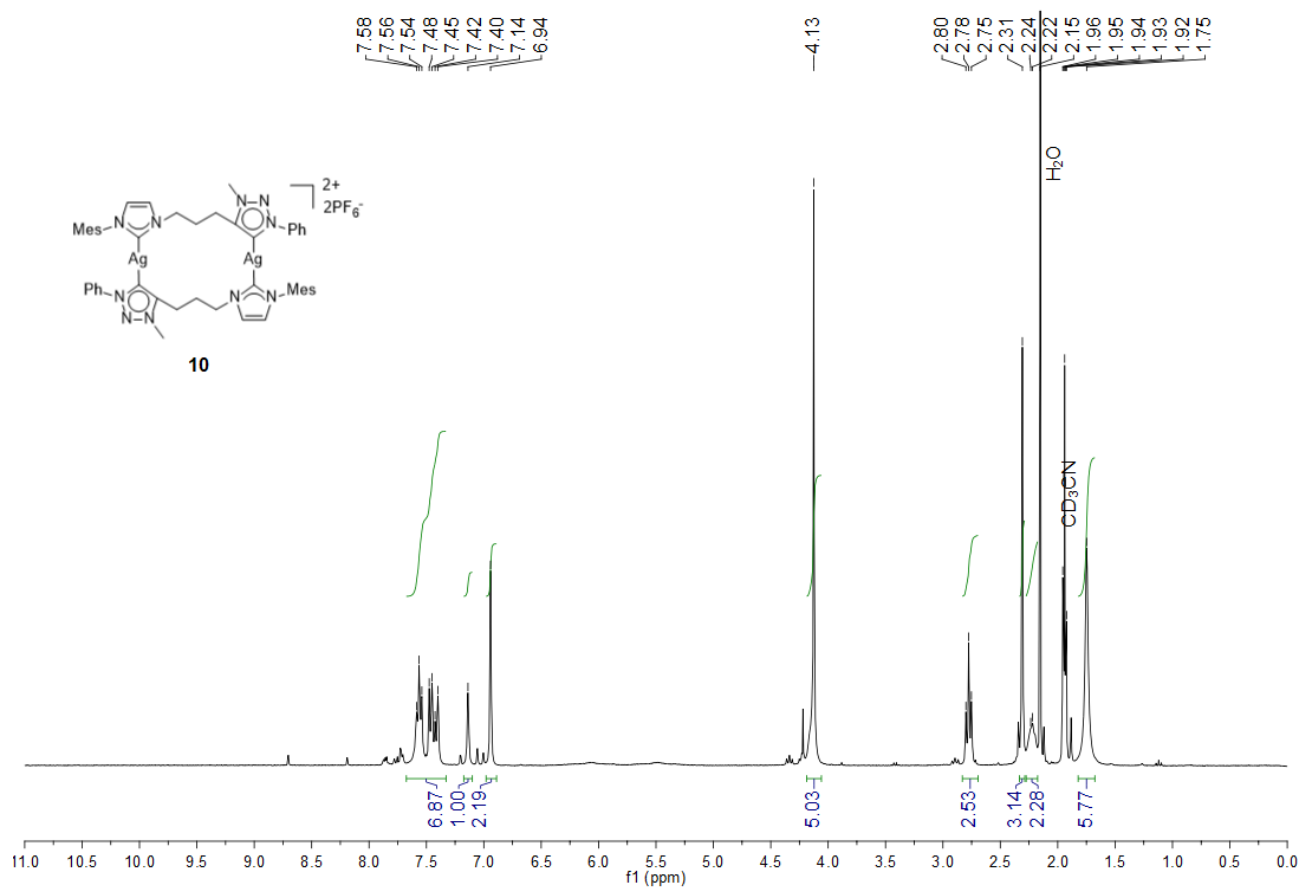

Figure S21.  $^1\text{H}$  NMR of complex **10** in  $\text{CD}_3\text{CN}$ .

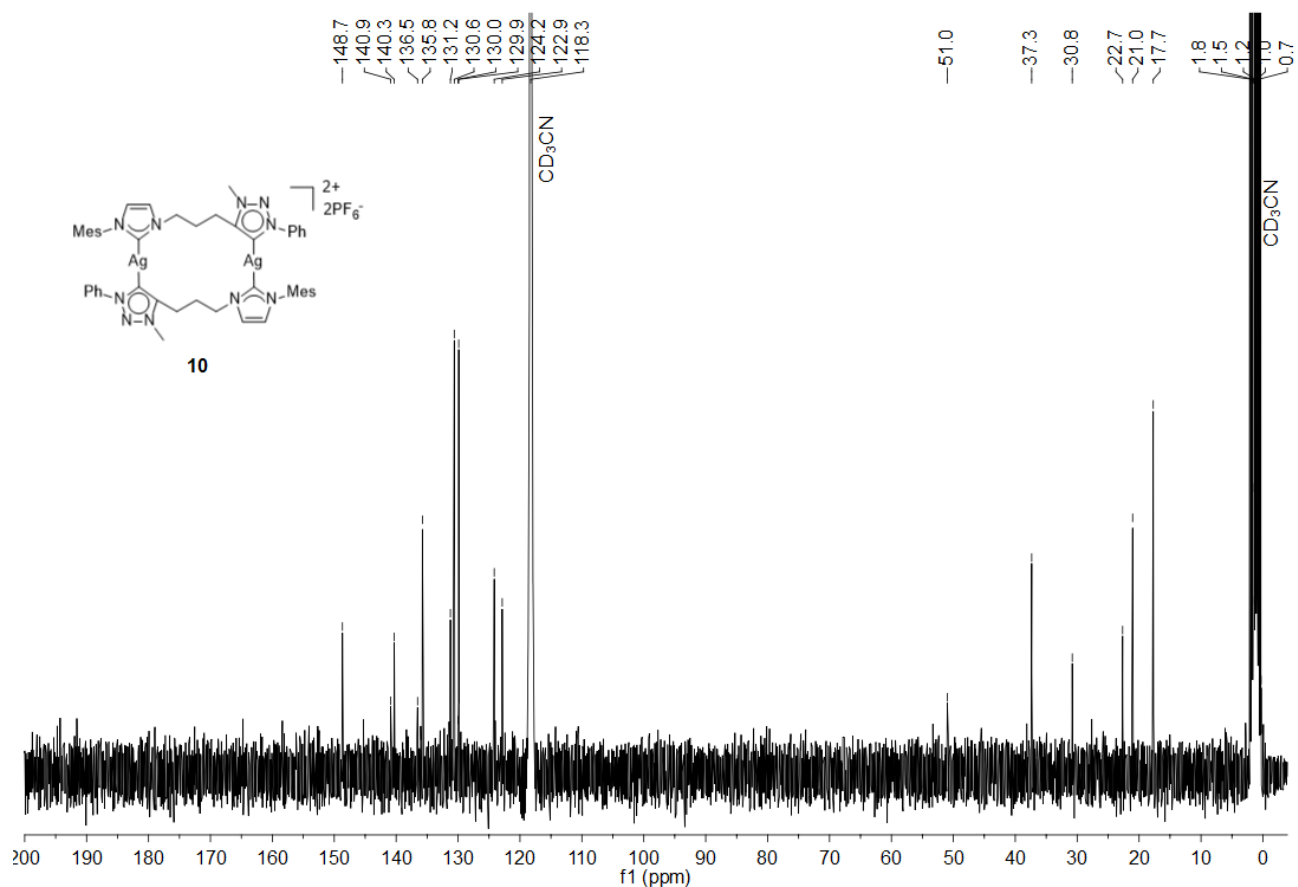

Figure S22 <sup>13</sup>C{<sup>1</sup>H} NMR of complex **10** in CD<sub>3</sub>CN.

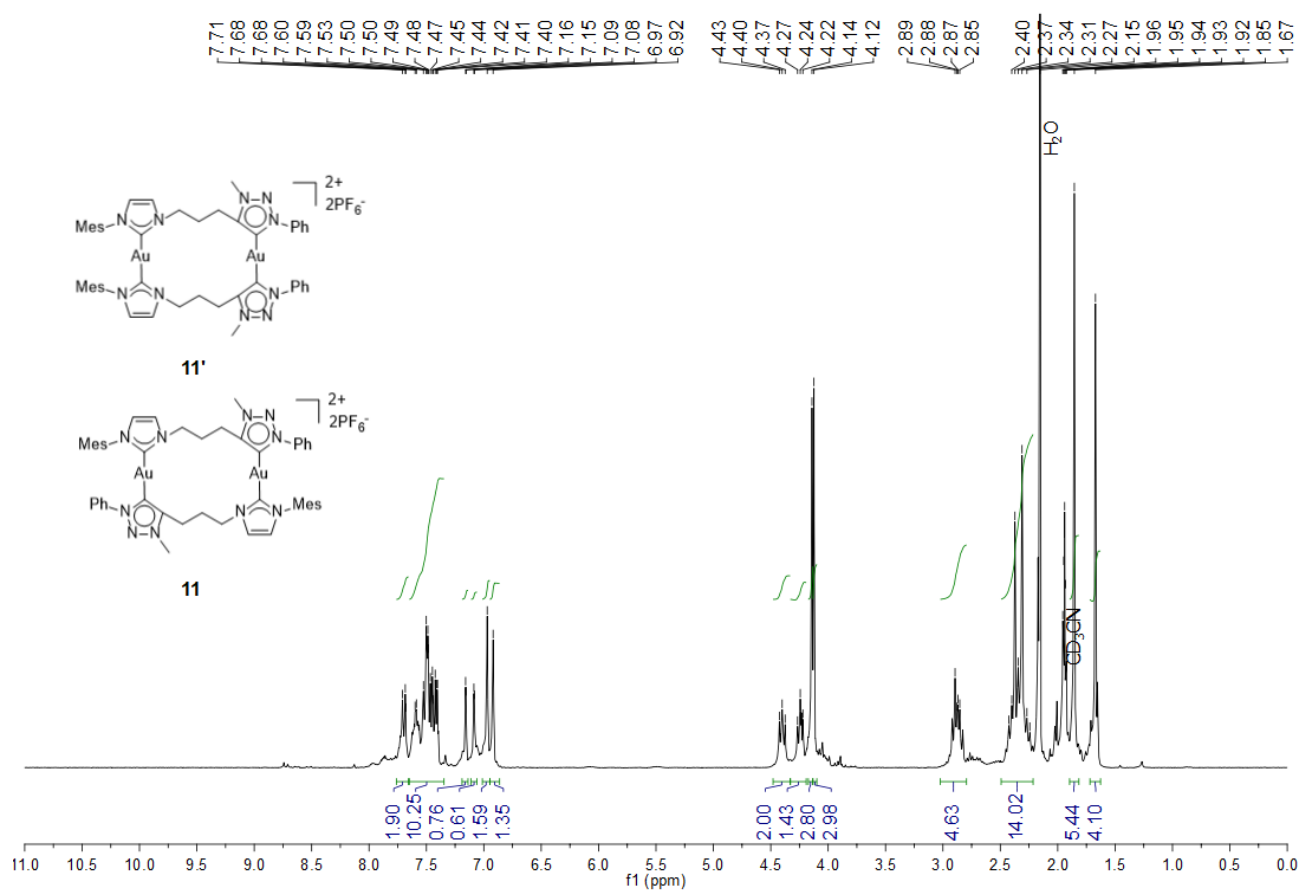

Figure S23. <sup>1</sup>H NMR of the mixture of complexes **11/11'** in CD<sub>3</sub>CN.

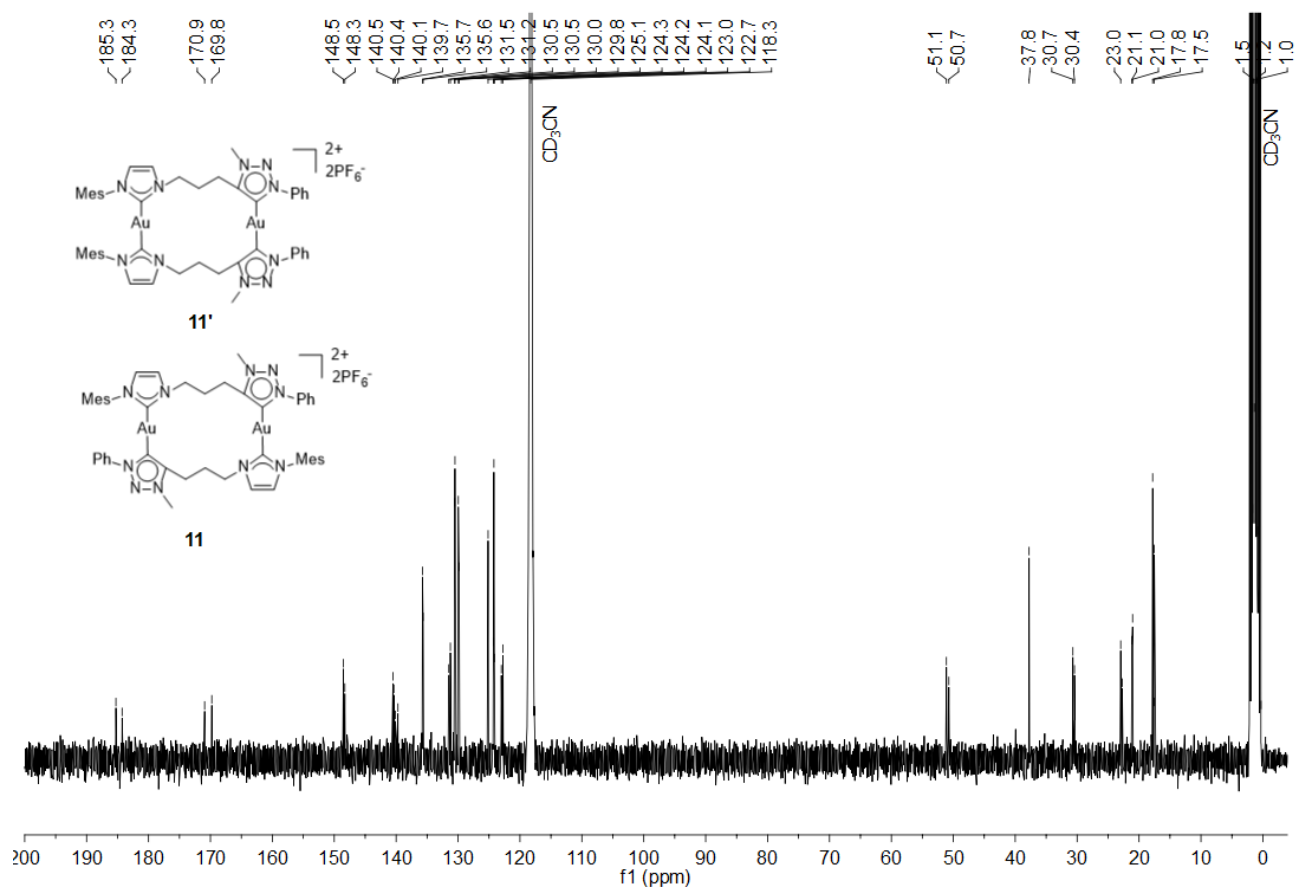

Figure S24.  $^{13}\text{C}\{^1\text{H}\}$  NMR of the mixture of complexes **11/11'** in  $\text{CD}_3\text{CN}$ .

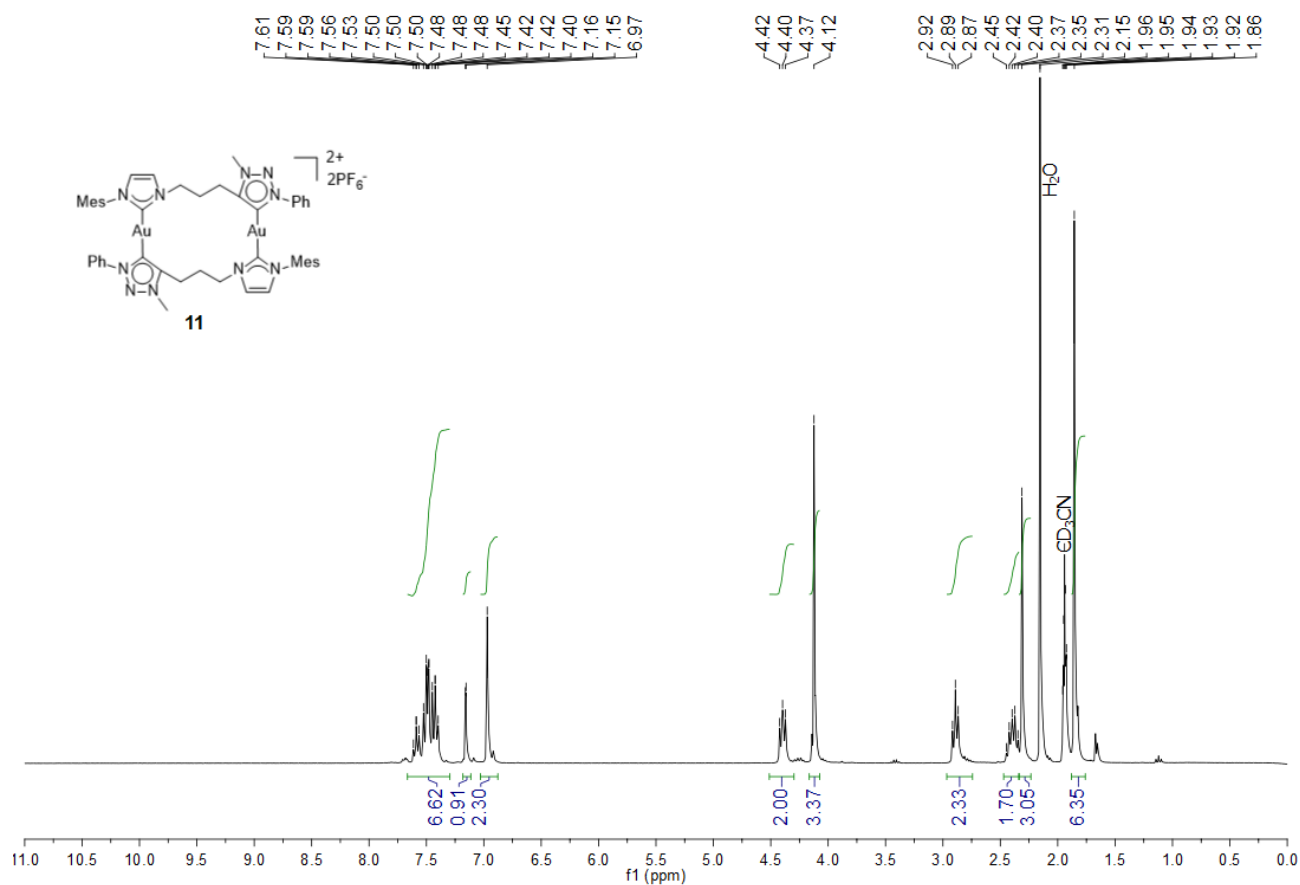

Figure S25.  $^1\text{H}$  NMR of the complex **11** in  $\text{CD}_3\text{CN}$ .

**Table S1.** Crystal data and structure refinement for compounds **3b**, **4**, **6**, **7** and **11**

| Compound                                    | <b>3b</b>                                                                     | <b>4</b>                                          | <b>6</b>                                           | <b>7</b>                                                                        | <b>11</b>                                                                                      |
|---------------------------------------------|-------------------------------------------------------------------------------|---------------------------------------------------|----------------------------------------------------|---------------------------------------------------------------------------------|------------------------------------------------------------------------------------------------|
| Empirical formula                           | C <sub>24</sub> H <sub>29</sub> F <sub>12</sub> N <sub>5</sub> P <sub>2</sub> | C <sub>18</sub> H <sub>24</sub> AuIN <sub>4</sub> | C <sub>46</sub> H <sub>50</sub> AuIN <sub>10</sub> | C <sub>94</sub> H <sub>108</sub> Au <sub>3</sub> I <sub>9</sub> N <sub>32</sub> | C <sub>48</sub> H <sub>54</sub> Au <sub>2</sub> F <sub>12</sub> N <sub>10</sub> P <sub>2</sub> |
| Formula weight                              | 677.46                                                                        | 620.28                                            | 1066.82                                            | 3419.12                                                                         | 1454.88                                                                                        |
| Temperature/K                               | 294(7)                                                                        | 297.3(3)                                          | 298.9(6)                                           | 298(2)                                                                          | 297.3(4)                                                                                       |
| Crystal system                              | monoclinic                                                                    | monoclinic                                        | triclinic                                          | triclinic                                                                       | monoclinic                                                                                     |
| Space group                                 | P2 <sub>1</sub> /n                                                            | P2 <sub>1</sub> /n                                | P-1                                                | P-1                                                                             | P2 <sub>1</sub> /c                                                                             |
| a/Å                                         | 7.3780(3)                                                                     | 6.5131(3)                                         | 10.1224(4)                                         | 9.3633(2)                                                                       | 12.7531(6)                                                                                     |
| b/Å                                         | 28.1830(15)                                                                   | 13.8875(5)                                        | 14.3562(5)                                         | 14.5000(4)                                                                      | 8.4120(4)                                                                                      |
| c/Å                                         | 14.5586(7)                                                                    | 11.8617(5)                                        | 15.8637(6)                                         | 23.1244(7)                                                                      | 25.2975(10)                                                                                    |
| $\alpha$ /°                                 | 90                                                                            | 90                                                | 96.879(3)                                          | 106.078(2)                                                                      | 90                                                                                             |
| $\beta$ /°                                  | 98.482(4)                                                                     | 103.920(4)                                        | 99.056(3)                                          | 91.868(2)                                                                       | 96.017(4)                                                                                      |
| $\gamma$ /°                                 | 90                                                                            | 90                                                | 93.241(3)                                          | 108.675(2)                                                                      | 90                                                                                             |
| Volume/Å <sup>3</sup>                       | 2994.1(2)                                                                     | 1041.39(8)                                        | 2253.48(15)                                        | 2832.44(14)                                                                     | 2698.9(2)                                                                                      |
| Z                                           | 4                                                                             | 2                                                 | 2                                                  | 1                                                                               | 2                                                                                              |
| $\rho_{\text{calc}}/\text{cm}^3$            | 1.503                                                                         | 1.978                                             | 1.572                                              | 2.004                                                                           | 1.790                                                                                          |
| $\mu/\text{mm}^{-1}$                        | 0.244                                                                         | 24.952                                            | 3.993                                              | 26.869                                                                          | 5.574                                                                                          |
| F(000)                                      | 1384.0                                                                        | 584.0                                             | 1056.0                                             | 1610.0                                                                          | 1416.0                                                                                         |
| Crystal size/mm <sup>3</sup>                | 0.3 × 0.1 × 0.08                                                              | 0.2 × 0.08 × 0.08                                 | 0.3 × 0.1 × 0.08                                   | 0.2 × 0.1 × 0.1                                                                 | 0.3 × 0.15 × 0.04                                                                              |
| Radiation                                   | MoK $\alpha$ ( $\lambda$ = 0.71073)                                           | CuK $\alpha$ ( $\lambda$ = 1.54184)               | MoK $\alpha$ ( $\lambda$ = 0.71073)                | CuK $\alpha$ ( $\lambda$ = 1.54184)                                             | Mo K $\alpha$ ( $\lambda$ = 0.71073)                                                           |
| 2 $\Theta$ range for data collection/°      | 5.178 to 52.742                                                               | 9.98 to 117.866                                   | 4.808 to 52.742                                    | 6.728 to 130.156                                                                | 4.794 to 52.734                                                                                |
| Reflections collected                       | 12962                                                                         | 4470                                              | 17515                                              | 33736                                                                           | 29048                                                                                          |
| Independent reflections                     | 6082                                                                          | 1492                                              | 9212                                               | 9336                                                                            | 5514                                                                                           |
| Data/restraints/parameters                  | 6082/648/502                                                                  | 1492/0/113                                        | 9212/0/529                                         | 9336/520/629                                                                    | 5514/63/338                                                                                    |
| Goodness-of-fit on F <sup>2</sup>           | 1.044                                                                         | 1.020                                             | 1.061                                              | 1.062                                                                           | 1.093                                                                                          |
| Final R indexes [ $I \geq 2\sigma(I)$ ]     | R <sub>1</sub> = 0.0572, wR <sub>2</sub> = 0.1491                             | R <sub>1</sub> = 0.0496, wR <sub>2</sub> = 0.1407 | R <sub>1</sub> = 0.0337, wR <sub>2</sub> = 0.0877  | R <sub>1</sub> = 0.0594, wR <sub>2</sub> = 0.1488                               | R <sub>1</sub> = 0.0330, wR <sub>2</sub> = 0.0785                                              |
| Final R indexes [all data]                  | R <sub>1</sub> = 0.0744, wR <sub>2</sub> = 0.1628                             | R <sub>1</sub> = 0.0557, wR <sub>2</sub> = 0.1532 | R <sub>1</sub> = 0.0379, wR <sub>2</sub> = 0.0908  | R <sub>1</sub> = 0.0686, wR <sub>2</sub> = 0.1553                               | R <sub>1</sub> = 0.0392, wR <sub>2</sub> = 0.0818                                              |
| Largest diff. peak/hole / e Å <sup>-3</sup> | 0.40/-0.28                                                                    | 1.24/-1.66                                        | 2.61/-1.34                                         | 3.08/-1.87                                                                      | 2.28/-0.95                                                                                     |
| CCDC                                        | 1903106                                                                       | 1903104                                           | 1903103                                            | 1903105                                                                         | 1903107                                                                                        |
